# Supplementary material
Source: PubMed Central journal article supplement (PMC4961586)
Supplement: NIHMS776337-supplement-supplement_1.pdf [file NIHMS776337-supplement-supplement_1.pdf]

**Supplemental Table 1.** Patient Characteristics and Univariable Analysis of the Two Study Centers

| <b>Variable</b>                | <b>All patients</b> | <b>MSKCC</b>    | <b>AMC</b>      | <b>p Value</b> |
|--------------------------------|---------------------|-----------------|-----------------|----------------|
| Age, mean $\pm$ SD             | 62.7 $\pm$ 11.1     | 64.2 $\pm$ 17.4 | 62.7 $\pm$ 13.3 | 0.67           |
| Sex                            |                     |                 |                 | 0.46           |
| Female                         | 105 (36.6)          | 52 (34.4)       | 53 (39.0)       |                |
| Male                           | 182 (63.4)          | 99 (65.6)       | 83 (61.0)       |                |
| Bismuth classification         |                     |                 |                 | 0.47           |
| Left or right duct             | 30 (10.5)           | 13 (8.6)        | 17 (12.5)       |                |
| 1                              | 11 (3.8)            | 8 (5.3)         | 3 (2.2)         |                |
| 2                              | 20 (7.0)            | 13 (8.6)        | 7 (5.1)         |                |
| 3A – right                     | 102 (35.5)          | 51 (33.8)       | 51 (37.5)       |                |
| 3B – left                      | 72 (25.1)           | 37 (24.5)       | 35 (25.7)       |                |
| 4                              | 52 (18.1)           | 29 (19.2)       | 23 (16.9)       |                |
| Lobar atrophy                  |                     |                 |                 | 0.01           |
| None                           | 172 (59.9)          | 81 (53.6)       | 91 (66.9)       |                |
| Right                          | 51 (17.8)           | 26 (17.2)       | 25 (18.4)       |                |
| Left                           | 64 (22.3)           | 44 (29.1)       | 20 (14.7)       |                |
| Type of liver resection        |                     |                 |                 | 0.34           |
| Central hepatectomy            | 3 (1.0)             | 0 (0)           | 3 (2.2)         |                |
| Left hemihepatectomy           | 102 (35.5)          | 53 (35.1)       | 49 (36.0)       |                |
| Left extended hemihepatectomy  | 36 (12.5)           | 17 (11.3)       | 19 (14.0)       |                |
| Right hemihepatectomy          | 46 (16.0)           | 24 (15.9)       | 22 (16.2)       |                |
| Right extended hemihepatectomy | 100 (34.8)          | 57 (37.7)       | 43 (31.6)       |                |
| Portal vein reconstruction     |                     |                 |                 | 0.02           |
| No                             | 236 (82.2)          | 132 (87.4)      | 104 (76.5)      |                |
| Yes                            | 51 (17.8)           | 19 (12.6)       | 32 (23.5)       |                |
| FLR volume*                    |                     |                 |                 | 0.37           |
| Large >50%                     | 115 (47.3)          | 53 (43.4)       | 62 (51.2)       |                |
| Intermediate 30-50%            | 76 (31.3)           | 39 (32.0)       | 37 (30.6)       |                |
| Small <30%                     | 52 (21.4)           | 30 (24.6)       | 22 (18.2)       |                |
| Jaundice                       |                     |                 |                 | 0.42           |
| No                             | 46 (16.0)           | 27 (17.9)       | 19 (14.0)       |                |
| Yes                            | 241 (84.0)          | 124 (82.1)      | 117 (86.0)      |                |
| FLR drainage*                  |                     |                 |                 | <0.001         |
| Complete                       | 173 (71.2)          | 68 (55.7)       | 105 (86.8)      |                |
| Incomplete                     | 70 (28.8)           | 54 (44.3)       | 16 (13.2)       |                |
|                                |                     |                 |                 |                |

|                                         |            |            |            |        |
|-----------------------------------------|------------|------------|------------|--------|
| Incomplete drainage<br>+ FLR below 50%* |            |            |            |        |
| No                                      | 204 (84.0) | 91 (74.6)  | 113 (93.4) | <0.001 |
| Yes                                     | 39 (16.0)  | 31 (25.4)  | 8 (6.6)    |        |
| Preoperative cholangitis*               |            |            |            | <0.001 |
| No                                      | 213 (76.3) | 127 (84.7) | 86 (66.7)  |        |
| Yes                                     | 66 (23.7)  | 23 (15.3)  | 43 (33.3)  |        |

Data are presented as number (%), unless stated otherwise.

\*The variable cholangitis was missing in 8 patients; FLR assessment was missing in 44 patients.

AMC; Academic Medical Center Amsterdam; FLR, future liver remnant; IQR interquartile range; MSKCC, Memorial Sloan Kettering Cancer Center; SD, standard deviation
